# Supplementary material
Source: publisher site journal article supplement (https://www.dovepress.com/article/495112)
Supplement: Supplementary file 1 [file get_supplementary_file.php]

**Supplementary Materials**

**Table S1**. Longitudinal Effects of Time, Fear of Falling, and Static Balance on Dynamic Balance. σ2—residual variance at level 1 (observation). ICC—intraclass correlation, AIC—Akaike information criterion, and BIC—Bayesian information criterion. Bolded p-values represent significance as defined as p-value < 0.05. Timed Up and Go score is representative of dynamic balance such that increased values indicate worse performance and decreased values indicate improved performance. The model below describes an interaction between timepoint and %MVPA.

|  | **Timed Up and Go (TUG) Score** | | |
| --- | --- | --- | --- |
| *Predictors* | *Beta* | *Confidence Interval* | *p-value* |
| (Intercept) | 4.55 | -4.14 – 13.25 | 0.304 |
| T2-T1 | 1.06 | -0.91 – 3.02 | 0.290 |
| T3-T1 | 2.81 | 0.72 – 4.90 | **0.009** |
| T4-T1 | 1.41 | -1.06 – 3.88 | 0.262 |
| %MVPA | -0.08 | -0.42 – 0.26 | 0.644 |
| FRA Distance | 0.05 | 0.01 – 0.08 | **0.010** |
| Age | 0.06 | -0.06 – 0.17 | 0.334 |
| Sex | -2.16 | -4.48 – 0.17 | 0.069 |
| T2-T1 x %MVPA | -0.24 | -0.66 – 0.18 | 0.259 |
| T3-T1 x %MVPA | -0.34 | -0.78 – 0.09 | 0.119 |
| T4-T1 x %MVPA | -0.39 | -0.96 – 0.19 | 0.187 |
| **Random Effects** | | | |
| σ2 | 24.73 | | |
| τ00 study_id | 10.65 | | |
| ICC | 0.30 | | |
| N study_id | 140 | | |
| Observations | 438 | | |
| Marginal R2 / Conditional R2 | 0.081 / 0.358 | | |
| AIC / BIC | 2792.09 / 2845.16 | | |

**Table S2**. Longitudinal Effects of Time, Fear of Falling, and Static Balance on Dynamic Balance. σ2—residual variance at level 1 (observation). ICC—intraclass correlation, AIC—Akaike information criterion, and BIC—Bayesian information criterion. Bolded p-values represent significance as defined as p-value < 0.05. Timed Up and Go score is representative of dynamic balance such that increased values indicate worse performance and decreased values indicate improved performance. The model below describes an interaction between timepoint and FRA Distance.

|  | **Timed Up and Go (TUG) Score** | | | |
| --- | --- | --- | --- | --- |
| *Predictors* | *Beta* | *Confidence Interval* | *p-value* |
| (Intercept) | 6.00 | -2.75 – 14.74 | 0.179 |
| T2-T1 | -1.03 | -3.57 – 1.50 | 0.424 |
| T3-T1 | 0.53 | -2.25 – 3.32 | 0.707 |
| T4-T1 | 0.31 | -2.66 – 3.28 | 0.837 |
| FRA Distance | 0.04 | -0.01 – 0.08 | 0.109 |
| %MVPA | -0.29 | -0.54 – -0.04 | **0.021** |
| Age | 0.05 | -0.06 – 0.16 | 0.368 |
| Sex | -2.18 | -4.51 – 0.15 | 0.066 |
| T2-T1 x FRA Distance | 0.04 | -0.03 – 0.10 | 0.285 |
| T3-T1 x FRA Distance | 0.03 | -0.04 – 0.10 | 0.425 |
| T4-T1 x FRA Distance | -0.01 | -0.09 – 0.07 | 0.806 |
| **Random Effects** | | | | |
| σ2 | 24.85 | | | |
| τ00 study_id | 10.59 | | | |
| ICC | 0.30 | | | |
| N study_id | 140 | | | |
| Observations | 438 | | | |
| Marginal R2 / Conditional R2 | 0.081 / 0.355 | | | |
| AIC / BIC | 2804.60 / 2857.67 | | | |

**Table S3**. Longitudinal Effects of Time, Fear of Falling, and Static Balance on Dynamic Balance. σ2—residual variance at level 1 (observation). ICC—intraclass correlation, AIC—Akaike information criterion, and BIC—Bayesian information criterion. Bolded p-values represent significance as defined as p-value < 0.05. Timed Up and Go score is representative of dynamic balance such that increased values indicate worse performance and decreased values indicate improved performance. The model below describes an interaction between %MVPA and FRA Distance.

|  | **Timed Up and Go (TUG) Score** | | | |
| --- | --- | --- | --- | --- |
| *Predictors* | *Beta* | *Confidence Interval* | *p-value* |
| (Intercept) | 5.12 | -3.55 – 13.78 | 0.247 |
| T2-T1 | 0.18 | -1.03 – 1.39 | 0.765 |
| T3-T1 | 1.53 | 0.21 – 2.86 | **0.023** |
| T4-T1 | 0.02 | -1.42 – 1.46 | 0.977 |
| FRA Distance | 0.06 | 0.01 – 0.11 | **0.026** |
| %MVPA | -0.20 | -0.61 – 0.22 | 0.356 |
| Age | 0.05 | -0.06 – 0.17 | 0.353 |
| Sex | -2.12 | -4.46 – 0.22 | 0.075 |
| %MVPA x FRA Distance | -0.00 | -0.01 – 0.01 | 0.598 |
| **Random Effects** | | | | |
| σ2 | 24.80 | | | |
| τ00 study_id | 10.63 | | | |
| ICC | 0.30 | | | |
| N study_id | 140 | | | |
| Observations | 438 | | | |
| Marginal R2 / Conditional R2 | 0.078 / 0.355 | | | |
| AIC / BIC | 2796.05 / 2840.95 | | | |

**Table S4**. Age-Dependent Effects of FRA Distance on Dynamic Balance. σ2—residual variance at level 1 (observation). ICC—intraclass correlation, AIC—Akaike information criterion, and BIC—Bayesian information criterion. Bolded p-values represent significance as defined as p-value < 0.05. Timed Up and Go score is representative of dynamic balance such that increased values indicate worse performance and decreased values indicate improved performance. The model below explores the non-significant interaction between FRA Distance and Age, demonstrating that the variable does not vary by age.

|  | **Timed Up and Go (TUG) Score** | | | |
| --- | --- | --- | --- | --- |
| *Predictors* | *Beta* | *Confidence Interval* | *p-value* |
| (Intercept) | -0.41 | -16.64 – 15.81 | 0.960 |
| T2-T1 | 0.20 | -1.01 – 1.41 | 0.745 |
| T3-T1 | 1.56 | 0.24 – 2.89 | **0.021** |
| T4-T1 | 0.13 | -1.32 – 1.57 | 0.864 |
| FRA Distance | 0.10 | -0.34 – 0.54 | 0.654 |
| Age | 0.12 | -0.10 – 0.33 | 0.286 |
| Sex | -2.39 | -4.76 – -0.01 | **0.049** |
| FRA Distance × Age | -0.00 | -0.01 – 0.01 | 0.829 |
| **Random Effects** | | | | |
| σ2 | 24.78 | | | |
| τ00 study_id | 11.30 | | | |
| ICC | 0.31 | | | |
| N study_id | 140 | | | |
| Observations | 438 | | | |
| Marginal R2 / Conditional R2 | 0.059 / 0.354 | | | |
| AIC / BIC | 2798.44 / 2839.26 | | | |
